# Supplementary material for: ERAPSO: Revealing the High Burden of Obesity in German Psoriasis Patients
Source: Springer Nature journal article supplement (doi:10.1007/s13555-019-0314-1), 2019-07-11
Supplement: MOESM1 [file 16921022]

Figure S1: Prevalence of CVRFs strongly correlates with BMI in ERAPSO participants.

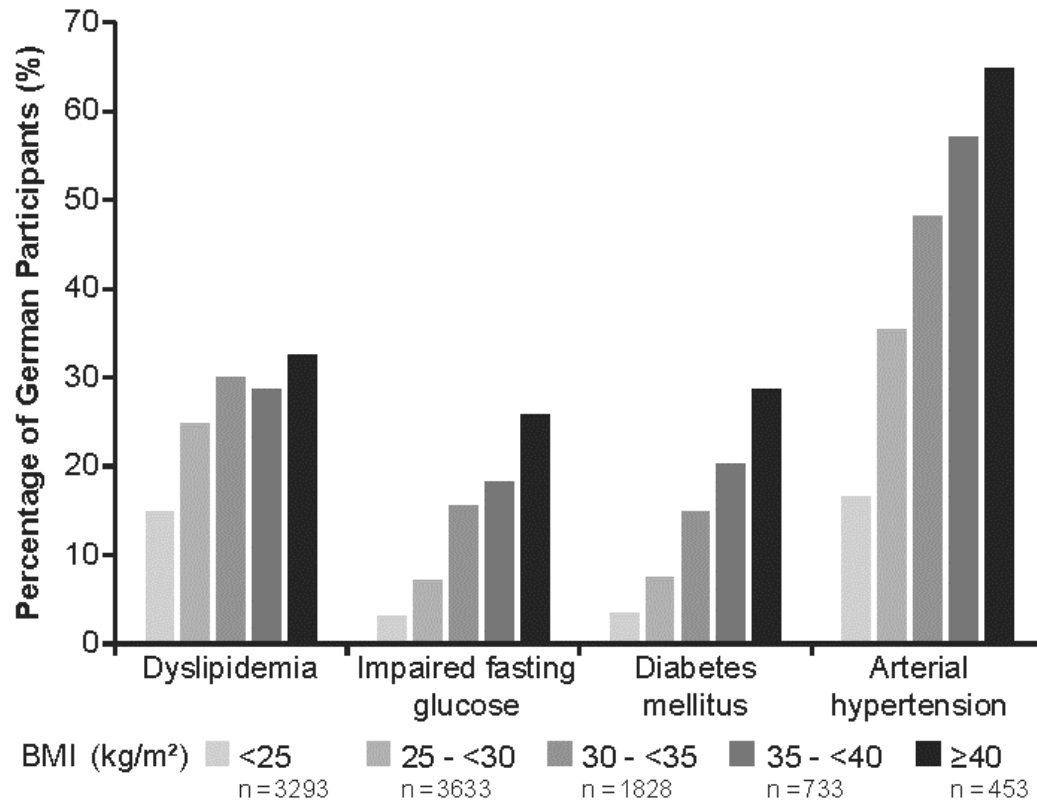

Figure S1 shows the percentage of participants according to BMI subgroups being diagnosed with CVRFs. Increasing prevalence of CVRFs was observed with growing BMI. Total N = 9,904, number of participants n per subgroup shown above. Abbreviations: CVRF = cardiovascular risk factor, BMI = Body Mass Index.

Figure S2: Prevalence of CVEs strongly correlates with BMI in ERAPSO participants.

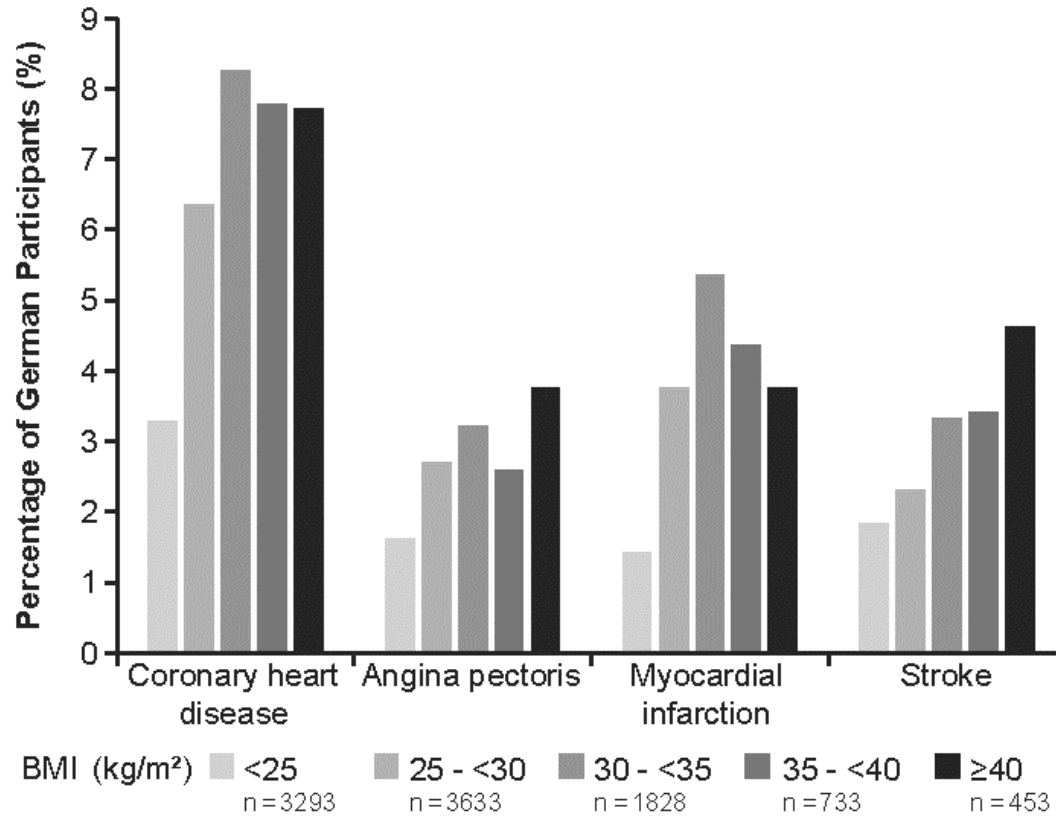

Figure S2 shows the percentage of participants according to BMI subgroups with a history of CVEs. Higher prevalence of cardiovascular risk factors with increased BMI translated into increased incidence of cardiovascular events. Total N = 9,904, number of participants n per subgroup shown above. Abbreviations: CVE = cardiovascular event, BMI = Body Mass Index.
